# Supplementary material for: Loop 7 of E2 Enzymes: An Ancestral Conserved Functional Motif Involved in the E2-Mediated Steps of the Ubiquitination Cascade
Source: PubMed Central journal article supplement (PMC3399832; doi:10.1371/journal.pone.0040786), 2012-07-18
Supplement: pone.0040786.s001.pdf [file pone.0040786.s001.pdf]

| <i>Hs_Ube2G2</i>  |   | α1                         |                       | β1                    |      | β2     |      | β3   |
|-------------------|---|----------------------------|-----------------------|-----------------------|------|--------|------|------|
|                   |   | Q                          | Q                     | Q                     | Q    | Q      | Q    | Q    |
|                   |   | TT                         |                       | TT                    |      | TT     |      | TT   |
| <i>Hs_Ube2G2</i>  | 1 | MAGTALKRLMAYKQLTLN         | PPEG                  | IVAGPMNENFFEWELIMGP   | EDT  | CFEFGV | VFP  | AILS |
| <i>Rn_Ube2G2</i>  | 1 | MAGTALKRLMAYKQLTLN         | PPEG                  | IVAGPMNENFFEWELIMGP   | EDT  | CFEFGV | VFP  | AILS |
| <i>Rn_G2</i>      | 1 | MAGTALKRLMAYKQLTLN         | PPEG                  | IVAGPMNENFFEWELIMGP   | EDT  | CFEFGV | VFP  | AILS |
| <i>Md_G2</i>      | 1 | MAGTALKRLMAYKQLTLN         | PPEG                  | IVAGPMNENFFEWELIMGP   | EDT  | CFEFGV | VFP  | AILS |
| <i>Gg_G2</i>      | 1 | MAGTALKRLMAYKQLTLN         | PPEG                  | IVAGPMNENFFEWELIMGP   | EDT  | CFEFGV | VFP  | AILS |
| <i>Xl_G2</i>      | 1 | MAGTALKRLMAYKQLTLN         | PPEG                  | IVAGPINENFFEWELIMGP   | EDT  | CFEFGV | VFP  | AILS |
| <i>Xt_G2</i>      | 1 | MAGTALKRLMAYKQLTLN         | PPEG                  | IVAGPINENFFEWELIMGP   | EDT  | CFEFGV | VFP  | AILS |
| <i>Dr_G2</i>      | 1 | MAGTALKRLMAYKQLTLN         | PPEG                  | IVAGPVNENFFEWELIMGP   | EDT  | CFEFGV | VFP  | AILS |
| <i>Tn_G2</i>      | 1 | MAGTALKRLMAYKQLTLN         | PPEG                  | IVAGPPNENFFEWELIMGP   | EDT  | CFEFGV | VFP  | AILS |
| <i>Nv_G2</i>      | 1 | MAGFALRLMAYKQLTLN          | PPEG                  | IVAGPVNENFFEWELITGP   | EGT  | CFEFGV | VFP  | AKLV |
| <i>Dm_G2</i>      | 1 | MAGSALRLMAYKQLTLD          | PPEG                  | IVAGPISDNFFEWELIAGP   | EGT  | CFEFGV | VFP  | ARLV |
| <i>Dp_G2</i>      | 1 | MAGSALRLMAYKQLTLD          | PPEG                  | IVAGPVSNDFFEWELIAGP   | EGT  | CFEFGV | VFP  | ARLV |
| <i>Aa_G2</i>      | 1 | MAGSALRLMAYKQLTLN          | PPEG                  | IVAGPVSNDFFEWELITGP   | EGT  | CFEFGV | VFP  | AKLV |
| <i>Tc_G2</i>      | 1 | MAGSALRLMAYKQLTLN          | PPEG                  | IVAGPINENFFEWELITGP   | EGT  | CFEFGV | VFP  | AKLI |
| <i>Ce_Ubc14</i>   | 1 | MAGYALKRLMTEYKELTRR        | PPEG                  | IVAAPIDDNFFEWELITGP   | EET  | CFANV  | VFP  | ARIT |
| <i>Cb_G2</i>      | 1 | MAGYALKRLMTEYKELTRR        | PPEG                  | IVAAPIDDNFFEWELITGP   | EET  | CFANV  | VFP  | ARIT |
| <i>Cp_G2</i>      | 1 | MAGSALRLMAYKQLTLN          | PIDS                  | IVAGPISDNFFEWELITGP   | EET  | CFEFGV | VFP  | AKLV |
| <i>Am_G2</i>      | 1 | MAGSALRLMAYKQLTLN          | PPEG                  | IVAGPINENFFEWELITGP   | EGT  | CFEFGV | VFP  | AKLI |
| <i>Sp_Ubc3</i>    | 1 | KAMALRLMKEYKELTEN          | PGD                   | IVAGPSNEDDFFTWDCLIQGP | DGT  | FFEGV  | LYP  | ATLK |
| <i>Sc_Ubc7</i>    | 1 | MSKTAQRLLKELQELIKD         | SPPG                  | IVAGPKSNNFIWDCLIQGP   | PDT  | PYADV  | VFN  | AKLE |
| <i>Cg_G2</i>      | 1 | MSKTAQRLLKELQELIKD         | SPPG                  | IVAGPKSNNFIWDCLIQGP   | PDT  | PYADV  | VFN  | AKLE |
| <i>Vp_G2</i>      | 1 | MSKTAQRLLKELQELIKD         | SPPG                  | IVAGPANENLFLWDCLIQGP  | PDT  | PYEHV  | VFN  | AQRL |
| <i>Asg_G2</i>     | 1 | MSKTAQRLLKELQELIKD         | SPDG                  | IVAGPVSNDLFLWDCLEGP   | ADSP | YEHV   | VFN  | ARLQ |
| <i>Pg_G2</i>      | 1 | MPRTTAQRLLKELQELIKD        | SPPG                  | IVAGPVSNDLFLWDCLEGP   | ADSP | YEHV   | VFN  | ARLQ |
| <i>Dh_G2</i>      | 1 | MAPRSTQAQRLLKELQELIKD      | PPPG                  | IVAGPISDDLFLWDCLEGP   | PDT  | PYENV  | VFP  | ASLT |
| <i>Ps_G2</i>      | 1 | MAPRSTQAQRLLKELQELIKD      | APPG                  | IVAGPVSDDLFLWDCLEGP   | PDT  | PYENV  | VFP  | ASLT |
| <i>Ca_G2</i>      | 1 | MPPRSTQAQRLLKELQELIKD      | PPPG                  | IVAGPVSNDLFLWDCLEGP   | SPT  | PYENV  | VFP  | AVLT |
| <i>Le_G2</i>      | 1 | MPPRSTQAQRLLKELQELIKD      | PPPG                  | IVAGPVSNDLFLWDCLEGP   | SPT  | PYENV  | VFP  | AVLT |
| <i>Hs_Ube2G1</i>  | 1 | MTLQASALLRQLAELNKN         | PVEG                  | FSAGLIDNDLYRWEVLIIGP  | PDT  | LYEGV  | VFK  | AHLT |
| <i>Mm_Ube2G1</i>  | 1 | MTLQASALLRQLAELNKN         | PVEG                  | FSAGLIDNDLYRWEVLIIGP  | PDT  | LYEGV  | VFK  | AHLT |
| <i>Rn_Ube2G1</i>  | 1 | MTLQASALLRQLAELNKN         | PVEG                  | FSAGLIDNDLYRWEVLIIGP  | PDT  | LYEGV  | VFK  | AHLT |
| <i>Md_G1</i>      | 1 | MTLQASALLRQLAELNKN         | PVEG                  | FSAGLIDNDLYRWEVLIIGP  | PDT  | LYEGV  | VFK  | AHLT |
| <i>Gg_G1</i>      | 1 | MTLQASALLRQLAELNKN         | PVEG                  | FSAGLIDNDLYRWEVLIIGP  | PDT  | LYEGV  | VFK  | AHLT |
| <i>Xl_G1</i>      | 1 | MTLQASALLRQLAELNKN         | PVEG                  | FSAGLIDNDLYRWEVLIIGP  | PDT  | LYEGV  | VFK  | AHLT |
| <i>Xt_G1</i>      | 1 | MTLQASALLRQLAELNKN         | PVEG                  | FSAGLIDNDLYRWEVLIIGP  | PDT  | LYEGV  | VFK  | AHLT |
| <i>Dr_1_G1</i>    | 1 | MTLQASALLRQLAELNKN         | PVEG                  | FSAGLIDNDLYRWEVLIIGP  | PDT  | LYEGV  | VFK  | AHLT |
| <i>Dr_2_G1</i>    | 1 | MTLQASALLRQLAELNKN         | PVEG                  | FSAGLIDDDIYQWVVIIGP   | QDT  | MFEGV  | VFN  | AHLT |
| <i>Tn_1_G1</i>    | 1 | MTLQASALLRQLAELNKN         | PVEG                  | FSAGLIDDDIYQWVVIIGP   | QDT  | MFEGV  | VFN  | AHLT |
| <i>Tn_2_G1</i>    | 1 | MTLQASALLRQLAELNKN         | PVEG                  | FSAGLIDDDIYQWVVIIGP   | QDT  | MFEGV  | VFN  | AHLT |
| <i>Nv_G1</i>      | 1 | MSLQASALLRQLAELNKN         | PVEG                  | FSAGLIDNDLYRWEVLIIGP  | PDT  | LYEGV  | VFK  | AHLT |
| <i>Dm_CG40045</i> | 1 | MSLQASALLRQLAELNKN         | PVEG                  | FSAGLIDNDLYRWEVLIIGP  | PDT  | LYEGV  | VFK  | AHLT |
| <i>Dm_CG9602</i>  | 1 | MSLQASALLRQLAELNKN         | PVEG                  | FSAGLIDNDLYRWEVLIIGP  | PDT  | LYEGV  | VFK  | AHLT |
| <i>Dp_G1</i>      | 1 | MSLQASALLRQLAELNKN         | PVEG                  | FSAGLIDNDLYRWEVLIIGP  | PDT  | LYEGV  | VFK  | AHLT |
| <i>Aa_G1</i>      | 1 | MSLQASALLRQLAELNKN         | PVEG                  | FSAGLIDNDLYRWEVLIIGP  | PDT  | LYEGV  | VFK  | AHLT |
| <i>Tc_G1</i>      | 1 | MSLQASALLRQLAELNKN         | PVEG                  | FSAGLIDNDLYRWEVLIIGP  | PDT  | LYEGV  | VFK  | AHLT |
| <i>Ce_Ubc7</i>    | 1 | MSLQASALLRQLAELNKN         | PVEG                  | FSAGLIDNDLYRWEVLIIGP  | PDT  | LYEGV  | VFK  | AHLT |
| <i>Cb_G1</i>      | 1 | MSLQASALLRQLAELNKN         | PVEG                  | FSAGLIDNDLYRWEVLIIGP  | PDT  | LYEGV  | VFK  | AHLT |
| <i>Sp_Ubc15</i>   | 1 | MPSSASEQLLRKQLKEIQKN       | PVPG                  | FSAGLIDNDLYRWEVLIIGP  | PDT  | LYEGV  | VFK  | AHLT |
| <i>Os_1_#</i>     | 1 | MATAASQASLLRQLKDLAKN       | PVDG                  | FSAGLVDSDNFVFWVVIIGP  | PDT  | LYDGV  | VFN  | AIMT |
| <i>Os_2_#</i>     | 1 | MAATISQASLLRQLKDLAKH       | PVDG                  | FSAGLVDSDNFVFWVVIIGP  | PDT  | LYDGV  | VFN  | AIMS |
| <i>Zm_1_#</i>     | 1 | MATTTQASLLRQLKDLAKH        | PVDG                  | FSAGLVDSDNFVFWVVIIGP  | PDT  | LYDGV  | VFN  | AIMS |
| <i>Zm_2_#</i>     | 1 | MASSASQASLLRQLKDLAKN       | PVDG                  | FSAGLVDSDNFVFWVVIIGP  | PDT  | LYDGV  | VFN  | AIMT |
| <i>Ta_Ubc7_#</i>  | 1 | MATAPARRASSRSESRT          | PSMG                  | FQLGFVDSNFVFWVVIIGP   | PDT  | LYDGV  | VFN  | AIMS |
| <i>Vv_1_#</i>     | 1 | MASSTQASLLRQLKDLCKN        | PVDG                  | FSAGLVDSDNFVFWVVIIGP  | PDT  | LYDGV  | VFN  | AIMS |
| <i>Vv_2_#</i>     | 1 | MASASTQASLLRQLKDLCKN       | PVDG                  | FSAGLVDSDNFVFWVVIIGP  | PDT  | LYDGV  | VFN  | AIMS |
| <i>Ah_#</i>       | 1 | MASASTQASLLRQLKDLCKN       | PVDG                  | FSAGLVDSDNFVFWVVIIGP  | PDT  | LYDGV  | VFN  | AIMS |
| <i>At_Ubc7_#</i>  | 1 | MASASTQASLLRQLKDLCKH       | PVDG                  | FSAGLVDSDNFVFWVVIIGP  | PDT  | LYDGV  | VFN  | AIMT |
| <i>At_Ubc13_#</i> | 1 | MNSAQASLLRQLKDLCKH         | PVDG                  | FSAGLVDSDNFVFWVVIIGP  | PDT  | LYDGV  | VFN  | AIMS |
| <i>At_Ubc14_#</i> | 1 | MANNQASLLRQLKDLCKH         | PVDG                  | FSAGLVDSDNFVFWVVIIGP  | PDT  | LYDGV  | VFN  | AIMS |
| <i>St_#</i>       | 1 | MASASTQASLLRQLKDLCKH       | PVDG                  | FSAGLVDSDNFVFWVVIIGP  | PDT  | LYDGV  | VFN  | AIMS |
| <i>Pt_#</i>       | 1 | MASASTQASLLRQLKDLCKN       | PVDG                  | FSAGLVDSDNFVFWVVIIGP  | PDT  | LYDGV  | VFN  | AIMS |
| <i>Pp_1_#</i>     | 1 | MAENQASLLRQLKDLCKN         | PVDG                  | FSAGLVDSDNFVFWVVIIGP  | PDT  | LYDGV  | VFN  | AIMS |
| <i>Pp_2_#</i>     | 1 | MAENQASLLRQLKDLCKN         | PVDG                  | FSAGLVDSDNFVFWVVIIGP  | PDT  | LYDGV  | VFN  | AIMS |
| <i>Psi_1_#</i>    | 1 | MGDFQAILLLRQLKDLCKN        | PLDG                  | FSAGLVDSDNFVFWVVIIGP  | PDT  | LYDGV  | VFN  | AIMT |
| <i>Psi_2_#</i>    | 1 | MGENQASLLRQLKDLCKN         | PVDG                  | FSAGLVDSDNFVFWVVIIGP  | PDT  | LYDGV  | VFN  | AIMS |
| <i>Cr_#</i>       | 1 | MTDALAASLLRQLKDLCKN        | PVDG                  | FSAGLVDSDNFVFWVVIIGP  | PDT  | LYDGV  | VFN  | AIMT |
| <i>Ol_#</i>       | 1 | MSDQAVLLRQLKDLCKN          | PIEG                  | FSAGLVDSDNFVFWVVIIGP  | PDT  | LYDGV  | VFN  | AIMS |
| <i>Hs_Ube2R1</i>  | 1 | MARPLVSSQKALLLELKLQEE      | PVEG                  | FRVTLVDSDNFVFWVVIIGP  | PNT  | YEGV   | YFK  | ARLK |
| <i>Mm_Ube2R1</i>  | 1 | MARPLVSSQKALLLELKLQEE      | PVEG                  | FRVTLVDSDNFVFWVVIIGP  | PNT  | YEGV   | YFK  | ARLK |
| <i>Rn_R1</i>      | 1 | MARPLVSSQKALLLELKLQEE      | PVEG                  | FRVTLVDSDNFVFWVVIIGP  | PNT  | YEGV   | YFK  | ARLK |
| <i>Md_R1</i>      | 1 | MARPLVSSQKALLLELKLQEE      | PVEG                  | FRVTLVDSDNFVFWVVIIGP  | PNT  | YEGV   | YFK  | ARLK |
| <i>Gg_R1</i>      | 1 | MARSLVSSQKALLLELKLQEE      | PVEG                  | FRVTLVDSDNFVFWVVIIGP  | PNT  | YEGV   | YFK  | ARLK |
| <i>Xl_R1</i>      | 1 | MARPMAPVSSQKALLLELKLQEE    | PVEG                  | FRVTLVDSDNFVFWVVIIGP  | PNT  | YEGV   | YFK  | ARLK |
| <i>Xt_R1</i>      | 1 | MARPVAPVSSQKALLLELKLQEE    | PVEG                  | FRVTLVDSDNFVFWVVIIGP  | PNT  | YEGV   | YFK  | ARLK |
| <i>Hs_Ube2R2</i>  | 1 | MAQQQMTSSQKALLLELKLQEE     | PVEG                  | FRITLVDSDNFVFWVVIIGP  | PNT  | YEGV   | YFK  | AHIK |
| <i>Mm_Ube2R2</i>  | 1 | MAQQQMTSSQKALLLELKLQEE     | PVEG                  | FRITLVDSDNFVFWVVIIGP  | PNT  | YEGV   | YFK  | AHIK |
| <i>Rn_R2</i>      | 1 | MAQQQMTSSQKALLLELKLQEE     | PVEG                  | FRITLVDSDNFVFWVVIIGP  | PNT  | YEGV   | YFK  | AHIK |
| <i>Md_R2</i>      | 1 | MAQQQMTSSQKALLLELKLQEE     | PVEG                  | FRITLVDSDNFVFWVVIIGP  | PNT  | YEGV   | YFK  | AHIK |
| <i>Gg_R2</i>      | 1 | MAQQQMTSSQKALLLELKLQEE     | PVEG                  | FRITLVDSDNFVFWVVIIGP  | PNT  | YEGV   | YFK  | AHIK |
| <i>Xl_R2</i>      | 1 | MAHQQMTSSQKALLLELKLQEE     | PVEG                  | FRITLVDSDNFVFWVVIIGP  | PNT  | YEGV   | YFK  | AHIK |
| <i>Xt_R2</i>      | 1 | MAHQQMTSSQKALLLELKLQEE     | PVEG                  | FRITLVDSDNFVFWVVIIGP  | PNT  | YEGV   | YFK  | AHIK |
| <i>Dr_R2</i>      | 1 | MAHQQMTSSQKALLLELKLQEE     | PVEG                  | FRITLVDSDNFVFWVVIIGP  | PNT  | YEGV   | YFK  | AHIK |
| <i>Tn_R2</i>      | 1 | MAHQQTSSQKALLLELKLQEE      | PVEG                  | FRITLVDSDNFVFWVVIIGP  | PNT  | YEGV   | YFK  | AHIK |
| <i>Nv_R2</i>      | 1 | MAQPTSSALRALALEYKSLQEE     | PVEG                  | FRVTLVDSDNFVFWVVIIGP  | PNT  | YEGV   | YFK  | AHIK |
| <i>Dm_CG7656</i>  | 1 | AAAPTPTTSSAVRALALEYKSLQEE  | PVEG                  | FRVTLVDSDNFVFWVVIIGP  | PNT  | YEGV   | YFK  | AHIK |
| <i>Aa_R</i>       | 1 | MSSQPSSAVRALALEYKSLQEE     | PVEG                  | FRVTLVDSDNFVFWVVIIGP  | PNT  | YEGV   | YFK  | AHIK |
| <i>Tc_R</i>       | 1 | MATTKATSSALRALALEYKSLQEE   | PVEG                  | FRVTLVDSDNFVFWVVIIGP  | PNT  | YEGV   | YFK  | AHIK |
| <i>Ce_Ubc3</i>    | 1 | MDSKASTSSGALRALALEYKSLQEE  | PVEG                  | FRVTLVDSDNFVFWVVIIGP  | PNT  | YEGV   | YFK  | AHIK |
| <i>Cb_R</i>       | 1 | MDSRSTSSGALRALALEYKSLQEE   | PVEG                  | FRVTLVDSDNFVFWVVIIGP  | PNT  | YEGV   | YFK  | AHIK |
| <i>Cp_R</i>       | 1 | MSSQPSSAVRALALEYKSLQEE     | PVEG                  | FRVTLVDSDNFVFWVVIIGP  | PNT  | YEGV   | YFK  | AHIK |
| <i>Am_R</i>       | 1 | MMAQTSSALRALALEYKSLQEE     | PVEG                  | FRVTLVDSDNFVFWVVIIGP  | PNT  | YEGV   | YFK  | AHIK |
| <i>Sc_Ubc3</i>    | 1 | MSSRKSTASLLLRQYRELTPDKKAI  | PSHIELEDSDNFVFWVVIIGP | PNT                   | YEGV | YFK    | AHIK |      |
| <i>Cg_R</i>       | 1 | MNSLKNSTASLLLRQYRELTPDKKAI | PSHIELEDSDNFVFWVVIIGP | PNT                   | YEGV | YFK    | AHIK |      |
| <i>Vp_R</i>       | 1 | MNSRNKSTASLLLRQYRELTPDKKAI | PSHIELEDSDNFVFWVVIIGP | PNT                   | YEGV | YFK    | AHIK |      |
| <i>Asg_R</i>      | 1 | MNSRNKSTASLLLRQYRELTPDKKAI | PSHIELEDSDNFVFWVVIIGP | PNT                   | YEGV | YFK    | AHIK |      |
| <i>Pg_R</i>       | 1 | MSKSAAILLQRFKDLTPDKKGI     | PSHIELDDSDNFVFWVVIIGP | PNT                   | YEGV | YFK    | AHIK |      |
| <i>Dh_R</i>       | 1 | MSKSAAILLQRFKDLTPDKKGI     | PSHIELDDSDNFVFWVVIIGP | PNT                   | YEGV | YFK    | AHIK |      |
| <i>Ps_R</i>       | 1 | MSKSAAILLQRFKDLTPDKKAI     | PSHIELDDSDNFVFWVVIIGP | PNT                   | YEGV | YFK    | AHIK |      |
| <i>Ca_R</i>       | 1 | MSKSAAILLQRFKDLTPDKKGI     | PSHIELDDSDNFVFWVVIIGP | PNT                   | YEGV | YFK    | AHIK |      |
| <i>Le_R</i>       | 1 | MSKSAAILLQRFKDLTPDKKAI     | PSHIELDDSDNFVFWVVIIGP | PNT                   | YEGV | YFK    | AHIK |      |

Hs\_Ube2G2 beta TT TT TT TT TT TT TT alpha2

```
Hs_Ube2G2 60 FFLDYPLSPPKMRFTCEMFHPNIYDPGRVCISILHAPGD DPMGYESSAERWSPVQSV EKILLSVVSM LAE
Mm_Ube2G2 60 FFLDYPLSPPKMRFTCEMFHPNIYDPGRVCISILHAPGD DPMGYESSAERWSPVQSV EKILLSVVSM LAE
Rn_G2 60 FFLDYPLSPPKMRFTCEMFHPNIYDPGRVCISILHAPGD DPMGYESSAERWSPVQSV EKILLSVVSM LAE
Md_G2 60 FFLDYPLSPPKMRFTCEMFHPNIYDPGRVCISILHAPGD DPMGYESSAERWSPVQSV EKILLSVVSM LAE
Gg_G2 60 FFLDYPLSPPKMRFTCEMFHPNIYDPGRVCISILHAPGD DPMGYESSAERWSPVQSV EKILLSVVSM LAE
Xl_G2 60 FFLDYPLSPPKMRFTCEMFHPNIYDPGRVCISILHAPGD DPMGYESSAERWSPVQSV EKILLSVVSM LAE
Xt_G2 60 FFLDYPLSPPKMRFTCEMFHPNIYDPGRVCISILHAPGD DPMGYESSAERWSPVQSV EKILLSVVSM LAE
Dr_G2 60 FPSDYPLSPPKMRFTCEMFHPNIYDPGRVCISILHAPGD DPMGYESSAERWSPVQSV EKILLSVVSM LAE
Tn_G2 60 FPSDYPLSPPKMRFTCEMFHPNIYDPGRVCISILHAPGD DPMGYESSAERWSPVQSV EKILLSVVSM LAE
Nv_G2 60 FPTDYPLSPPKMRFTCEMFHPNIYSDGRVCISILHAPGD DPMGYESSAERWSPVQSV EKILLSVVSM LAE
Dm_G2 60 FPTDYPLSPPKMRFTCEMFHPNIYADGRVCISILHAPGD DPMGYELSAERWSPVQSV EKILLSVVSM LAE
Dp_G2 60 FPTDYPLSPPKMRFTCEMFHPNIYADGRVCISILHAPGD DPLGYELSAERWSPVQSV EKILLSVVSM LAE
Aa_G2 60 FPTDYPLSPPKMRFTCEMFHPNIYADGRVCISILHAPGD DPLGYELSAERWSPVQSV EKILLSVVSM LAE
Tc_G2 60 FPTDYPLSPPKMRFTCEMFHPNIYADGRVCISILHAPGD DPMGYESSAERWSPVQSV EKILLSVVSM LAE
Ce_Ubc14 60 FPQDYPLSPPKMRFTCEMFHPNIYADGRVCISILHAPGD DPTGYELSAERWSPVQSV EKILLSVVSM LAE
Cb_G2 60 FPQDYPLSPPKMRFTCEMFHPNIYADGRVCISILHAPGD DPTGYESSAERWSPVQSV EKILLSVVSM LAE
Cp_G2 60 FPTDYPLSPPKMRFTCEMFHPNIYADGRVCISILHAPGD DPLGYELSAERWSPVQSV EKILLSVVSM LAE
Am_G2 60 FPTDYPLSPPKMRFTCEMFHPNIYADGRVCISILHAPGD DPMGYESSAERWSPVQSV EKILLSVVSM LAE
Sp_Ubc3 61 FPSDYLSPPKMRFTCEMFHPNIYADGRVCISILHAPGD DPMGYESSAERWSPVQSV EKILLSVVSM LAE
Sc_Ubc7 60 FPKDYPLSPPKMLTFTPSILHPNIYPNGEVCISILHSPGD DPNMYELABERWSPVQSV EKILLSVVSM LAE
Cg_G2 60 FPKDYPLSPPKMLTFTPSILHPNIYPNGEVCISILHSPGD DPNMYELABERWSPVQSV EKILLSVVSM LAE
Vp_G2 60 FPRDYPLSPPKMLTFTPAILHPNIYPNGEVCISILHSPGD DPNMYELABERWSPVQSV EKILLSVVSM LAE
Asg_G2 60 FPRDYPLSPPKMLTFTPSILHPNIYPNGEVCISILHAPGD DPNMYEASERWSPVQSV EKILLSVVSM LAE
Pg_G2 61 FPKDYPLSPPKMLKFDPPILHPNIYADGTVCISILHSPGD DPNHYERPERWSPVQSV EKILLSVVSM LAE
Dh_G2 62 FPKDYPLSPPKMLKFDPPILHPNIYADGTVCISILHSPGD DPNQYERPERWSPVQSV EKILLSVVSM LAE
Ps_G2 62 FPKDYPLSPPKMLKFDPPILHPNIYADGTVCISILHSPGD DPNQYERPERWSPVQSV EKILLSVVSM LAE
Ca_G2 62 FPKDYPLSPPKMLKFDPPILHPNIYADGTVCISILHSPGD DPNQYERPERWSPVQSV EKILLSVVSM LAE
Le_G2 62 FPKDYPLSPPKMLKFDPPILHPNIYADGTVCISILHSPGD DPNQYERPERWSPVQSV EKILLSVVSM LAE
Hs_Ube2G1 61 FPKDYPLRPPKMKFFITEIWHPNVKNKGDVVCISILHEP GEDKXGYEKPBERWLPPIHVETIMI SVISMLAD
Mm_Ube2G1 61 FPKDYPLRPPKMKFFITEIWHPNVKNKGDVVCISILHEP GEDKXGYEKPBERWLPPIHVETIMI SVISMLAD
Rn_Ube2G1 61 FPKDYPLRPPKMKFFITEIWHPNVKNKGDVVCISILHEP GEDKXGYEKPBERWLPPIHVETIMI SVISMLAD
Md_G1 61 FPKDYPLRPPKMKFFITEIWHPNVKNKGDVVCISILHEP GEDKXGYEKPBERWLPPIHVETIMI SVISMLAD
Gg_G1 61 FPKDYPLRPPKMKFFITEIWHPNVKNKGDVVCISILHEP GEDKXGYEKPBERWLPPIHVETIMI SVISMLAD
Xl_G1 61 FPRDYPLRPPKMKFFITEIWHPNVKNKGDVVCISILHEP GEDKXGYEKPBERWLPPIHVETIMI SVISMLAD
Xt_G1 61 FPRDYPLRPPKMKFFITEIWHPNVKNKGDVVCISILHEP GEDKXGYEKPBERWLPPIHVETIMI SVISMLAD
Dr_1_G1 61 FPKDYPLRPPKMKFFITEIWHPNVKNKGDVVCISILHEP GEDKXGYEKPBERWLPPIHVETIMI SVISMLAD
Dr_2_G1 60 FPHDYPLRPPKMKFFITEIWHPNVAKNGDVVCISILHEP GEDKXGYEKPBERWLPPIHVETIMI SVISMLAD
Tn_1_G1 60 FPSDYPLRPPKMKFFISQMWHPNVAKNGEVCISILHEP GEDKXGYERPERWLPPIHVETIMI SVISMLAD
Tn_2_G1 62 FPKDYPLRPPKMKFFITDWHPNVKNKGDVVCISILHEP GEDKXGYEKPBERWLPPIHVETIMI SVISMLAD
Nv_G1 61 FPKDYPLRPPKMKFFITEIWHPNVKNKGDVVCISILHEP GEDKXGYEKASERWLPVHVETILI SVISMLAD
Dm_CG40045 61 FPKDYPLRPPKMKFFVTEIWHPNVKNKGDVVCISILHEP GEDKXGYEKASERWLPVHVETILI SVISMLAD
Dm_CG9602 61 FPKDYPLRPPKMKFFVTEIWHPNVKNKGDVVCISILHEP GEDKXGYEKASERWLPVHVETILI SVISMLAD
Dp_G1 61 FPKDYPLRPPKMKFFVTDIWHPNVKNKGDVVCISILHEP GEDKXGYEKASERWLPVHVETILI SVISMLAD
Aa_G1 61 FPKDYPLRPPKMKFFVTEIWHPNVKNKGDVVCISILHEP GEDKXGYEKASERWLPVHVETILI SVISMLAD
Tc_G1 61 FPKDYPLRPPKMKFFVTEIWHPNVKNKGDVVCISILHEP GEDKXGYEKASERWLPVHVETILI SVISMLAD
Ce_Ubc7 59 FPRDYPLRPPKMKFFISEIWHPNVKNKGDVVCISILHEP GEDKXGYERPERWLPVHVETILI SVISMLAD
Cb_G1 59 FPRDYPLRPPKMKFFISEIWHPNVKNKGDVVCISILHEP GEDKXGYERPERWLPVHVETILI SVISMLAD
Sp_Ubc15 61 FPKDYPLRPPKMKFFTTEIWHPNVKNKGDVVCISILHEP GEDKXGYEADAGERWLPVHVETILI SVISMLAD
Os_1_# 63 FPNYPPNPPSVRFTSEMWHPNVPYDPGRVCISILHPGD DPNGYELASERWTPVHVETIVL SVISMLSS
Os_2_# 63 FPNYPPNPPSVRFTSEMWHPNVPYDPGRVCISILHPGD DPNGYELASERWTPVHVETIVL SVISMLSS
Zm_1_# 63 FPNYPPNPPSVRFTSEMWHPNVPYDPGRVCISILHPGD DPNGYELASERWTPVHVETIVL SVISMLSS
Zm_2_# 63 FPNYPPNPPSVRFTSEMWHPNVPYDPGRVCISILHPGD DPNGYELASERWTPVHVETIVL SVISMLSS
Ta_Ubc7_# 62 FPNYPPNPPSVRFTSEMWHPNVPYDPGRVCISILHPGD DPNGYELASERWTPVHVETIVL SVISMLSS
Vv_1_# 62 FPNYPPNPPSVRFTSDMWHPNVPYDPGRVCISILHPGD DPNGYELASERWTPVHVETIVL SVISMLSS
Vv_2_# 64 FPNYPPNPPSVRFTSEVWHPNVPYDPGRVCISILHPGD DPNGYELASERWMPHVETIVL SVISMLSS
Ah_# 60 FPNYPPNPPSVRFTSEIWHPNVPYDPGRVCISILHPGD DPNGYELASERWNPVHVETIVL SVISMLSS
At_Ubc7_# 60 FPNYPPNPPSVRFTSDMWHPNVPYDPGRVCISILHPGD DPSGYELASERWTPVHVETIVL SVISMLSS
At_Ubc13_# 60 FPNYPPNPPSVRFTSDMWHPNVPYDPGRVCISILHPGD DPSGYELASERWTPVHVETIVL SVISMLSS
At_Ubc14_# 61 FPNYPPNPPSVRFTSEMWHPNVPYDPGRVCISILHPGD DPHGYELASERWTPVHVETIVL SVISMLSS
St_# 60 FPNYPPNPPSVRFTTEIWHPNVYSDGKVCISILHPGD DPNGYEYASERWSPVHVETIVL SVISMLSS
Pt_# 61 FPNYPPNPPSVRFTSEMWHPNVPYDPGRVCISILHPGD DPNGYELATERWSPVHVETIVL SVISMLSS
Pp_1_# 61 FPDYPPNPPSVRFTSEMWHPNVPYDPGRVCISILHAPGD DPNGYELASERWSPVHVETIVL SVIAMLSN
Pp_2_# 61 FPNYPPNPPSVRFTSDMWHPNVPYDPGRVCISILHAPGD DPNGYELASERWSPVHVETIVL SVISMLSS
Psi_1_# 61 FPNYPPNPPSVRFTSEMWHPNVPYDPGRVCISILHPGD DPNGYELASERWTPVHVETIVL SVISMLSS
Psi_2_# 61 FPNYPPNPPSVRFTSEMWHPNVPYDPGRVCISILHAPGD DPNGYELASERWSPVHVETIVL SVISMLSS
Cr_# 61 FPKDYPPNPPSIRFTSEMWHPNVPYDPGRVCISILHSPGD DPSGYETAASERWSPVHVETIVL SVISMLSS
Ol_# 60 FPKDYPPNPPSIRFTSEMWHPNVPYDPGRVCISILHSPGD DPNGYETAASERWSPVHVETIVL SVISMLSS
Hs_Ube2R1 64 FPDYPPYSPPAFRFLTKMWHPNIYETGDVVCISILHPVD DPQSGELPSEERWNPQNVRTILL SVISLLNE
Mm_Ube2R1 64 FPDYPPYSPPAFRFLTKMWHPNIYETGDVVCISILHPVD DPQSGELPSEERWNPQNVRTILL SVISLLNE
Rn_R1 64 FPDYPPYSPPAFRFLTKMWHPNIYETGDVVCISILHPVD DPQSGELPSEERWNPQNVRTILL SVISLLNE
Md_R1 64 FPDYPPYSPPAFRFLTKMWHPNIYETGDVVCISILHPVD DPQSGELPSEERWNPQNVRTILL SVISLLNE
Gg_R1 64 FPDYPPYSPPAFRFLTKMWHPNIYETGDVVCISILHPVD DPQSGELPSEERWNPQNVRTILL SVISLLNE
Xl_R1 66 FPDYPPYSPPAFRFLTKMWHPNIYENGDVVCISILHPVD DPQSGELPSEERWNPQNVRTILL SVISLLNE
Xt_R1 66 FPDYPPYSPPAFRFLTKMWHPNIYENGDVVCISILHPVD DPQSGELPSEERWNPQNVRTILL SVISLLNE
Hs_Ube2R2 64 FPDYPPYSPPAFRFLTKMWHPNIYENGDVVCISILHPVD DPQSGELPSEERWNPQNVRTILL SVISLLNE
Mm_Ube2R2 64 FPDYPPYSPPAFRFLTKMWHPNIYENGDVVCISILHPVD DPQSGELPSEERWNPQNVRTILL SVISLLNE
Rn_R2 64 LPDYRCPVPGAFRCFVWHPNIYENGDVVCISILHPVD DPQSGELPSEERWNPQNVRTILL SVISLLNE
Md_R2 64 FPDYPPYSPPAFRFLTKMWHPNIYENGDVVCISILHPVD DPQSGELPSEERWNPQNVRTILL SVISLLNE
Gg_R2 63 FPDYPPYSPPAFRFLTKMWHPNIYENGDVVCISILHPVD DPQSGELPSEERWNPQNVRTILL SVISLLNE
Xl_R2 64 FPDYPPYSPPAFRFLTKMWHPNIYENGDVVCISILHPVD DPQSGELPSEERWNPQNVRTILL SVISLLNE
Xt_R2 64 FPDYPPYSPPAFRFLTKMWHPNIYENGDVVCISILHPVD DPQSGELPSEERWNPQNVRTILL SVISLLNE
Dr_R2 64 FPDYPPYSPPAFRFLTKMWHPNIYENGDVVCISILHPVD DPQSGELPSEERWNPQNVRTILL SVISLLNE
Tn_R2 64 FPDYPPYSPPAFRFLTKMWHPNIYENGDVVCISILHPVD DPQSGELPSEERWNPQNVRTILL SVISLLNE
Nv_R2 63 FPDYPPYSPSIRFMTKVWHPNIYENGDVVCISILHPVD DPQSGELPCERWNPQNVRTILL SVISLLNE
Dm_CG7656 67 FPHDYPPYSPSIRFMTKVWHPNIYENGDVVCISILHPVD DPQSGELPCERWNPQNVRTILL SVISLLNE
Aa_R 64 FPDYPPYSPSIRFMTKVWHPNIYENGDVVCISILHPVD DPQSGELPCERWNPQNVRTILL SVISLLNE
Tc_R 65 FPDYPPYSPSIRFMTKVWHPNIYENGDVVCISILHPVD DPQSGELPCERWNPQNVRTILL SVISLLNE
Ce_Ubc3 65 FPNYPPYSPSIRFMTKVWHPNIYENGDVVCISILHSPIDDPQSGELACERWNPQNVRTILL SVISLLNE
Cb_R 65 FPNYPPYSPSIRFMTKVWHPNIYENGDVVCISILHAPVD DPQSGELACERWNPQNVRTILL SVISLLNE
Cp_R 64 FPDYPPYSPSIRFMTKVWHPNIYENGDVVCISILHPVD DPQSGELPCERWNPQNVRTILL SVISLLNE
Am_R 63 FPDYPPYSPSIRFMTKVWHPNIYENGDVVCISILHPVD DPQSGELPCERWNPQNVRTILL SVISLLNE
Sc_Ubc3 66 FPDYPPYSPQFRFTPAYHPNIYRGRVCISILHQSG DPTSDPDATSWSPVQTVESVLI SVSLLLED
Cg_R 66 FPDYPPYSPQFRFTPAYHPNIYRGRVCISILHQSG DPTSDPDATSWSPVQTVESVLI SVSLLLED
Vp_R 66 FPDYPPYSPQFRFTPAYHPNIYRGRVCISILHQSG DPTSDPDATSWSPVQTVESVLI SVSLLLED
Asg_R 66 FPDYPPYSPQFRFTPAYHPNIYRGRVCISILHQSG DPTSDPDATSWSPVQTVESVLI SVSLLLED
Pg_R 63 FPDYPPYSPQFRFTPAYHPNIYRGRVCISILHQSG DPTSDPDATSWSPVQTVESVLI SVSLLLED
Dh_R 63 FPDYPPYSPQFRFTPAYHPNIYRGRVCISILHQSG DPTSDPDATSWSPVQTVESVLI SVSLLLED
Ps_R 63 FPDYPPYSPQFRFTPAYHPNIYRGRVCISILHQSG DPTSDPDATSWSPVQTVESVLI SVSLLLED
Ca_R 63 FPDYPPYSPQFRFTPAYHPNIYRGRVCISILHQSG DPTSDPESETSWSPVQTVESVLI SVSLLLED
Le_R 63 FPDYPPYSPQFRFTPAYHPNIYRGRVCISILHQSG DPTSDPESETSWSPVQTVESVLI SVSLLLED
```

|            |     |          | α3               |         |           |      | α4  |        |       |      |  |
|------------|-----|----------|------------------|---------|-----------|------|-----|--------|-------|------|--|
| Hs_Ube2G2  | TT  | 00000000 | 0000000000000000 |         |           |      |     |        |       |      |  |
| Hs_Ube2G2  | 130 | PNDES    | GANVDA           | SKMWRD  | .....     | DRE  | QFY | KIAKQI | VQKS  | LGL  |  |
| Mm_Ube2G2  | 130 | PNDES    | GANVDA           | SKMWRD  | .....     | DRE  | QFY | KIAKQI | VQKS  | LGL  |  |
| Rn_G2      | 130 | PNDES    | GANVDA           | SKMWRD  | .....     | DRE  | QFY | KIAKQI | VQKS  | LGL  |  |
| Md_G2      | 130 | PNDES    | GANVDA           | SKMWRD  | .....     | DRE  | QFY | RIAKQT | VQKS  | LGL  |  |
| Gg_G2      | 130 | PNDES    | GANVDA           | SKMWRD  | .....     | DRE  | QFN | KIAKQI | VQKS  | LGL  |  |
| Xl_G2      | 130 | PNDES    | GANVDA           | SKMWRD  | .....     | DRE  | QFN | TIARQT | VQKS  | LGL  |  |
| Xt_G2      | 130 | PNDES    | GANVDA           | SKMWRD  | .....     | DRE  | QFN | KIARQT | VQKS  | LGL  |  |
| Dr_G2      | 130 | PNDES    | GANVDA           | SKMWRD  | .....     | DRE  | QFN | RLAKQI | VRKS  | LGL  |  |
| Tn_G2      | 130 | PNDES    | GANVDA           | SKMWRD  | .....     | DRD  | QFN | KLAKQI | VRKS  | LGL  |  |
| Nv_G2      | 130 | PNDES    | GANVDA           | AKMWRD  | .....     | DRT  | EFN | RIAKQL | VRKT  | LGI  |  |
| Dm_G2      | 130 | PNDES    | GANVDA           | AIMWRD  | .....     | QRD  | EFN | AIARRL | VRKT  | LGL  |  |
| Dp_G2      | 130 | PNDES    | GANVDA           | AIMWRD  | .....     | RRE  | EFN | SIARRL | VRKT  | LGL  |  |
| Aa_G2      | 130 | PNDES    | GANVDA           | AIMWRD  | .....     | NRE  | EFN | KIAKRI | VRKT  | LGL  |  |
| Tc_G2      | 130 | PNDES    | GANVDA           | AKMWRD  | .....     | NRE  | EFN | RIABRI | VRRT  | LGI  |  |
| Ce_Ubc14   | 130 | PNDES    | PANVSA           | AKMWRD  | .....     | DRA  | QFE | KIADSL | VRKT  | LCL  |  |
| Cb_G2      | 130 | PNDES    | PANVNA           | AKMWRD  | .....     | DRA  | QFE | KTADAL | VRKT  | LCL  |  |
| Cp_G2      | 130 | PNDES    | GANVDA           | AIMWRD  | .....     | NRD  | EFN | KIAKRI | VRKS  | LGL  |  |
| Am_G2      | 130 | PNDES    | GANVDA           | AKMWRD  | .....     | DRE  | EFN | RIAKQL | VRKT  | LGI  |  |
| Sp_Ubc3    | 131 | PNDES    | GANIDA           | CKMWRD  | .....     | DRE  | EYC | RVVRL  | ARKT  | LGL  |  |
| Sc_Ubc7    | 130 | PNDES    | GANIDA           | ACILWRD | .....     | NRP  | EFE | RQVKLS | ILKS  | LGF  |  |
| Cg_G2      | 130 | PNDES    | GANIDA           | ACILWRD | .....     | NRA  | EFE | KQVKLS | ILKS  | LGF  |  |
| Vp_G2      | 130 | PNDES    | GANIDA           | ACILWRD | .....     | NRP  | EFE | RQVKRS | IVAS  | LGL  |  |
| Asg_G2     | 130 | PNDES    | GANIDA           | ACILWRD | .....     | NRA  | DFE | RQVQES | VRRS  | LGL  |  |
| Pg_G2      | 131 | PNDES    | GANVDA           | ACKLWRD | .....     | HRQ  | EFD | RQVRS  | SHVRS | LGL  |  |
| Dh_G2      | 132 | PNDES    | GANIDA           | ACKLWRD | .....     | NRV  | EYD | RQIRDH | VRKT  | LGL  |  |
| Ps_G2      | 132 | PNDES    | GANIDA           | ACKLWRD | .....     | NRA  | EYN | SQIKKH | VRES  | LGL  |  |
| Ca_G2      | 132 | PNDES    | GANIDA           | ACKLWRD | .....     | NRA  | EYD | RQIRQH | HVKS  | LGL  |  |
| Le_G2      | 132 | PNDES    | GANIDA           | ACKLWRD | .....     | NRE  | LFD | EQVQSH | VRKS  | LGL  |  |
| Hs_Ube2G1  | 131 | PNGDS    | PANVDA           | AKKEWRD | .....     | DRNG | EFK | RKVAR  | VRKS  | QET  |  |
| Mm_Ube2G1  | 131 | PNGDS    | PANVDA           | AKKEWRD | .....     | DRNG | EFK | RKVAR  | VRKS  | QET  |  |
| Rn_Ube2G1  | 131 | PNGDS    | PANVDA           | AKKEWRD | .....     | DRNG | EFK | RKVAR  | VRKS  | QET  |  |
| Md_G1      | 131 | PNGDS    | PANVDA           | AKKEWRD | .....     | DRNG | EFK | RKVAR  | VRKS  | QET  |  |
| Gg_G1      | 131 | PNGDS    | PANVDA           | AKKEWRD | .....     | DRNG | EFK | RKVAR  | VRKS  | QET  |  |
| Xl_G1      | 131 | PNGDS    | PANVDA           | AKKEWRD | .....     | DRNG | EFK | RKVAR  | VRKS  | QET  |  |
| Xt_G1      | 131 | PNGDS    | PANVDA           | AKKEWRD | .....     | DRNG | EFK | RKVAR  | VRKS  | QET  |  |
| Dr_1_G1    | 131 | PNGDS    | PANVDA           | AKKEWRD | .....     | DRHG | EFK | RKVAR  | VRKS  | QET  |  |
| Dr_2_G1    | 130 | PNGDS    | PANVDA           | AKKEWRD | .....     | DPNG | EFK | RKVAR  | VRKS  | QEM  |  |
| Tn_1_G1    | 130 | PNGDS    | PANVDA           | AKKEWRD | .....     | DPQG | VFK | RKVAR  | VRRS  | QEE  |  |
| Tn_2_G1    | 132 | PNGDS    | PANVDA           | AKKEWRD | .....     | DRDG | EFK | RKVAR  | VRKS  | QD.  |  |
| Nv_G1      | 131 | PNDES    | PANVDA           | AKKEWRD | .....     | SYT  | EFK | RKVAR  | VRKS  | QEE  |  |
| Dm_CG40045 | 131 | PNDES    | PANVDA           | AKKEWRD | .....     | SYT  | DFK | RKVAR  | VRKS  | QEE  |  |
| Dm_CG9602  | 131 | PNDES    | PANVDA           | AKKEYRD | .....     | NYA  | EFK | RKVTR  | VRRS  | QEE  |  |
| Dp_G1      | 131 | PNDES    | PANVDA           | AKKEYRD | .....     | DPA  | EFK | RKVAR  | VRRS  | QEE  |  |
| Aa_G1      | 131 | PNDES    | PANVDA           | AKKEWRD | .....     | AYP  | EFK | RKVAR  | VRKS  | QED  |  |
| Tc_G1      | 131 | PNDES    | PANVDA           | AKKEWRD | .....     | MYG  | EFK | RKVAR  | VRKS  | QEE  |  |
| Ce_Ubc7    | 129 | PNDES    | PANVDA           | AKMQRE  | .....     | NYA  | EFK | KKVAQ  | VRRS  | QEE  |  |
| Cb_G1      | 129 | PNDES    | PANVDA           | AKMQRE  | .....     | NYA  | DFK | KKVAQ  | VRRS  | QEE  |  |
| Sp_Ubc15   | 131 | PNDES    | PANIDA           | AKKFRD  | .....     | NPQ  | EFK | KRVRL  | VRRS  | IEM  |  |
| Os_1_#     | 133 | PNDES    | PANIEA           | AKDWRD  | .....     | KRD  | DFK | KKVRR  | VRKS  | QEM  |  |
| Os_2_#     | 133 | PNDES    | PANIEA           | AKKEWRD | .....     | KRD  | DFK | KKVRR  | VRKS  | QEM  |  |
| Zm_1_#     | 133 | PNDES    | PANIEA           | AKKEWRD | .....     | QRD  | DFK | KKVRR  | VRKS  | QEM  |  |
| Zm_2_#     | 133 | PNDES    | PANIEA           | AKDWRD  | .....     | KRD  | DFK | KKVRR  | VRKS  | QEM  |  |
| Ta_Ubc7_#  | 131 | PNDES    | PANIEA           | AKDWRD  | .....     | KQD  | EFK | KKVRR  | VRKS  | QEM  |  |
| Vv_1_#     | 132 | PNDES    | PANIEA           | AKKEWRD | .....     | KRD  | EFK | KKVSR  | VRKS  | QEM  |  |
| Vv_2_#     | 134 | PNDES    | PANIEA           | AKKEWRD | .....     | RRD  | EFK | KKVSR  | VRRS  | QEM  |  |
| Ah_#       | 130 | PNDES    | PANVDA           | AKKEWRD | .....     | RRD  | DFK | KKVSR  | VRKS  | QEM  |  |
| At_Ubc7_#  | 130 | PNDES    | PANVDA           | AKKEWRD | .....     | KRD  | EFK | KKVSR  | VRKS  | QEM  |  |
| At_Ubc13_# | 130 | PNDES    | PANVDA           | AKKEWRD | .....     | KRD  | EFK | KKVSR  | VRKS  | QEM  |  |
| At_Ubc14_# | 131 | PNDES    | PANVDA           | AKKEWRD | .....     | NRA  | EFR | KKVSR  | VRRS  | QEM  |  |
| St_#       | 130 | PNDES    | PANVDA           | AKKEWRD | .....     | KRD  | EFK | KRVSR  | VRRS  | QDL  |  |
| Pt_#       | 131 | PNDES    | PANVDA           | AKQWRD  | .....     | SRE  | EFR | KKVSR  | VRKS  | QEM  |  |
| Pp_1_#     | 131 | PNDES    | PANVDA           | AKKEWRD | .....     | QRD  | EFO | RKVRR  | VRRS  | QEF  |  |
| Pp_2_#     | 131 | PNDES    | PANIDA           | AKKEWRD | .....     | TKE  | EFK | RKVSR  | VRRS  | QES  |  |
| Psi_1_#    | 131 | PNDES    | PANIDA           | AKKEWRD | .....     | HRD  | EFR | KKVGR  | VRKS  | QET  |  |
| Psi_2_#    | 131 | PNDES    | PANIDA           | AKKEWRD | .....     | HRD  | EFK | KKVSR  | VRRS  | QES  |  |
| Cr_#       | 131 | PNDES    | PANVDA           | AKMWRD  | .....     | NRD  | EFK | KRVAR  | VRKS  | QEM  |  |
| Ol_#       | 130 | PNDES    | PANVDA           | AKKEWRD | .....     | DYP  | AFK | KRVAR  | VRRS  | QEE  |  |
| Hs_Ube2R1  | 134 | PNTFS    | PANVDA           | SVMYR   | KWKESKGD  | DR   | EYD | DIRKQ  | VLGT  | KVD  |  |
| Mm_Ube2R1  | 134 | PNTFS    | PANVDA           | SVMYR   | KWKESKGD  | DR   | EYD | DIRKQ  | VLGT  | KVD  |  |
| Rn_R1      | 134 | PNTFS    | PANVDA           | SVMYR   | KWKESKGD  | DR   | EYD | DIRKQ  | VLGT  | KVD  |  |
| Md_R1      | 134 | PNTFS    | PANVDA           | SVMYR   | KWKESKGD  | DR   | EYD | DIRKQ  | VLGT  | KVD  |  |
| Gg_R1      | 134 | PNTFS    | PANVDA           | SVMYR   | KWKESKGD  | DR   | EYD | DIRKQ  | VLGT  | KVD  |  |
| Xl_R1      | 136 | PNTFS    | PANVDA           | SVMYR   | KWKESKGRD | DK   | EYD | DIRKQ  | VLST  | NAD  |  |
| Xt_R1      | 136 | PNTFS    | PANVDA           | SVMYR   | KWKESKGRD | DK   | EYD | DIRKQ  | VVST  | KAD  |  |
| Hs_Ube2R2  | 134 | PNTFS    | PANVDA           | SVMFR   | KWRDSKGD  | DK   | EYA | EIRKQ  | VSAT  | KAE  |  |
| Mm_Ube2R2  | 134 | PNTFS    | PANVDA           | SVMFR   | KWRDSKGD  | DK   | EYA | EIRKQ  | VSAT  | KAE  |  |
| Rn_R2      | 134 | PNTFS    | PANVDA           | SVMFR   | KWRDSKGD  | DK   | EYA | EIRKQ  | VSAT  | KAE  |  |
| Md_R2      | 134 | PNTFS    | PANVDA           | SVMFR   | KWRDSKGD  | DK   | EYA | EIRKQ  | VLAT  | KAE  |  |
| Gg_R2      | 133 | PNTFS    | PANVDA           | SVMFR   | KWRDSKGD  | DK   | EYA | EIRKQ  | VLAT  | KAE  |  |
| Xl_R2      | 134 | PNTFS    | PANVDA           | SVMFR   | KWRDSKGD  | DK   | EYA | EIRKQ  | VSAT  | KAE  |  |
| Xt_R2      | 134 | PNTFS    | PANVDA           | SVMFR   | KWRDSKGD  | DK   | EYA | EIRKQ  | VSAT  | KAE  |  |
| Dr_R2      | 134 | PNTFS    | PANVDA           | SVMFR   | KWRDSKGD  | DK   | EYA | EIRKQ  | VVST  | KAD  |  |
| Tn_R2      | 134 | PNTFS    | PANVDA           | SVMFR   | KWRDSKGD  | DK   | EYA | EIRKQ  | VLST  | AEE  |  |
| Nv_R       | 133 | PNTYS    | PANVDA           | SVMYR   | RWRDSKGRD | DK   | EYE | NIIRKQ | QAQA  | KVE  |  |
| Dm_CG7656  | 137 | PNTFS    | PANVDA           | SVMYR   | RWRDSQGD  | KN   | EYP | NIIRKQ | QAQA  | NAE  |  |
| Aa_R       | 134 | PNTFS    | PANVDA           | SVMYR   | RWRDSQGD  | KN   | EYP | NIIRKQ | QAQA  | KAE  |  |
| Tc_R       | 135 | PNTFS    | PANVDA           | SVMYR   | RWRDSKGRD | DK   | EYE | NIIRKQ | QAQA  | RAE  |  |
| Ce_Ubc3    | 135 | PNTSS    | PANVDA           | SVMYR   | KWKED     | QDP  | EYA | KIVTKQ | VEES  | KKV  |  |
| Cb_R       | 135 | PNTSS    | PANVDA           | SVMYR   | KWKEE     | QDP  | EYA | KIVTKQ | VEDS  | KKV  |  |
| Cp_R       | 134 | PNTFS    | PANVDA           | SVMYR   | RWRDSQGD  | KN   | EYP | NIIRKQ | QAQA  | KAE  |  |
| Am_R       | 133 | PNTYS    | PANVDA           | SVMYR   | RWRDSKGD  | DK   | EYE | NIIRKQ | QAQA  | KME  |  |
| Sc_Ubc3    | 135 | PNTNS    | PANVDA           | AVDYRK  | .....     | NPE  | QYK | QRVKME | VERS  | SKQD |  |
| Cg_R       | 135 | PNTSS    | PANVDA           | AVDFRK  | .....     | NPE  | QYK | QRVKME | VERS  | SKQD |  |
| Vp_R       | 135 | PNTSS    | PANVDA           | AVDYRK  | .....     | NPE  | QYK | QRVKME | VERS  | SKQD |  |
| Asg_R      | 135 | PNTSS    | PANVDA           | AVDYRK  | .....     | NPE  | QYK | QRVKLE | VERS  | SKQD |  |
| Pg_R       | 132 | PNVLL    | PANIDA           | SVELRK  | .....     | NPE  | AYK | KRVLQE | VERS  | SKQD |  |
| Dh_R       | 132 | PNVSS    | PANIDA           | SVELRK  | .....     | NPDA | YK  | KKVME  | VERS  | SKAD |  |
| Ps_R       | 132 | PNVSS    | PANIDA           | SVVFRK  | .....     | NPE  | AYK | KKVLHE | VERS  | SKAD |  |
| Ca_R       | 132 | PNGNS    | PANIDA           | SVVFRK  | .....     | NYN  | VYK | KKVLQE | VERS  | SKKD |  |
| Le_R       | 132 | PNGNS    | PANIDA           | SVVFRK  | .....     | NPE  | EYK | KKVLKE | VERS  | SKKD |  |
