# Supplementary material for: Loop 7 of E2 Enzymes: An Ancestral Conserved Functional Motif Involved in the E2-Mediated Steps of the Ubiquitination Cascade
Source: PubMed Central journal article supplement (PMC3399832; doi:10.1371/journal.pone.0040786), 2012-07-18
Supplement: pone.0040786.s003.pdf [file pone.0040786.s003.pdf]

|                            | System              | Loop 7  | Loop 8 |                  |                           |
|----------------------------|---------------------|---------|--------|------------------|---------------------------|
|                            |                     |         | Depth  |                  |                           |
|                            |                     |         | 3      | 4                | 5                         |
| EnsembleA                  | CDC34_1PZV → ScUbc3 | LEU 93  |        | PRO 134, ALA 135 | ILE 131, VAL 137, ALA 140 |
|                            | CDC34_2CYX → ScUbc3 | PRO 99  |        |                  |                           |
|                            | CDC34_2UCZ → ScUbc3 | MET 100 |        |                  |                           |
|                            |                     | PRO 104 |        |                  | PRO 134, ALA 135          |
|                            |                     | ALA 106 |        |                  | PRO 134, ALA 135          |
| <b>1PZV → CeUbc7</b>       |                     | LEU 92  |        | PRO 134, ALA 135 | ALA 139, ALA 140          |
|                            |                     | PRO 95  |        |                  |                           |
|                            |                     | PRO 105 |        |                  | PRO 134, ALA 135          |
| <b>2CYX → hsUbc2g2xray</b> |                     | LEU 93  |        | ALA 136          | VAL 138, ALA 140          |
|                            |                     | ALA 95  |        |                  | ALA 136                   |
|                            |                     | PRO 96  |        |                  |                           |
|                            |                     | PRO 100 |        |                  |                           |
|                            |                     | MET 101 |        |                  |                           |
|                            |                     | ALA 107 |        |                  | ALA 136                   |
| <b>2UCZ → ScUbc7</b>       |                     | LEU 93  |        | GLY 135, ALA 136 | ILE 138, ALA 140          |
|                            |                     | PRO 96  |        |                  | GLY 135, ALA 136          |
|                            |                     | PRO 100 |        |                  |                           |
|                            |                     | MET 102 |        |                  |                           |
|                            |                     | LEU 105 |        |                  | GLY 135                   |

|         |  |  |         |
|---------|--|--|---------|
| ALA 106 |  |  | GLY 135 |
|---------|--|--|---------|

|                        |         |  |                  |                           |
|------------------------|---------|--|------------------|---------------------------|
| <b>3FSH → MmUbe2g2</b> | LEU 93  |  | GLY 135, ALA 136 | VAL 138, ALA 140, SER 141 |
|                        | ALA 95  |  |                  | GLY 135, ALA 136          |
|                        | PRO 96  |  |                  | GLY 135, ALA 136          |
|                        | PRO 100 |  |                  |                           |
|                        | MET 101 |  |                  |                           |
|                        | ALA 107 |  |                  | GLY 135, ALA 136          |

|                                  |         |                  |                  |                  |
|----------------------------------|---------|------------------|------------------|------------------|
| <b>At_Ubc7.B99990003 → Model</b> | LEU 93  | PRO 135, ALA 136 | VAL 138          | ALA 140          |
|                                  | PRO 95  | PRO 135, ALA 136 | VAL 138          | ALA 140          |
|                                  | PRO 96  |                  | PRO 135, ALA 136 | PRO 130, VAL 138 |
|                                  | GLY 97  |                  | PRO 135, ALA 136 | PRO 130          |
|                                  | PRO 100 |                  |                  |                  |
|                                  | LEU 105 |                  |                  | PRO 135, ALA 136 |
|                                  | ALA 106 |                  |                  |                  |

|                                     |         |                  |                  |                  |
|-------------------------------------|---------|------------------|------------------|------------------|
| <b>Dm_CG40045.B99990001 → Model</b> | LEU 94  | PRO 136, ALA 137 | VAL 139          | PRO 131          |
|                                     | PRO 97  |                  | PRO 136, ALA 137 | PRO 131, VAL 139 |
|                                     | GLY 98  |                  | PRO 136, ALA 137 | PRO 131, VAL 139 |
|                                     | GLY 103 |                  |                  | PRO 136, ALA 137 |
|                                     | ALA 107 |                  |                  | PRO 136, ALA 137 |

|                              |        |  |                  |                                    |
|------------------------------|--------|--|------------------|------------------------------------|
| <b>2OB4 → Hcdc34_Model 2</b> | PRO 91 |  | PRO 131, ALA 132 | VAL 134, ALA 136, VAL 138, MET 139 |
|                              | PRO 92 |  |                  | PRO 131, ALA 132, SER 137          |
|                              | VAL 93 |  |                  | PRO 131, ALA 132                   |
|                              | PRO 96 |  |                  | PRO 131, ALA 132, VAL 134, VAL 138 |
|                              | GLY 99 |  |                  | VAL 134, ALA 136                   |

|         |  |                  |                                                |
|---------|--|------------------|------------------------------------------------|
| LEU 101 |  | ALA 132, VAL 134 | PHE 129, PRO 131, ALA 136, VAL 138,<br>MET 139 |
| PRO 102 |  | ALA 132, VAL 134 | PHE 129, PRO 131, ALA 136, VAL 138,<br>MET 139 |

|                              |         |         |                                                |                                                         |
|------------------------------|---------|---------|------------------------------------------------|---------------------------------------------------------|
| <b>2OB4 → Hcdc34_Model 3</b> | PRO 91  | PHE 129 | PRO 131, ALA 132, VAL 134, ALA 136, VAL<br>138 | MET 139                                                 |
|                              | PRO 92  |         | PHE 129, SER 130, PRO 131                      | ALA 132, VAL 134, ALA 136, VAL 138, MET<br>139          |
|                              | VAL 93  |         |                                                | PHE 129, PRO 130, PRO 131, ALA 132,<br>VAL 134, VAL 138 |
|                              | PRO 96  |         |                                                |                                                         |
|                              | LEU 101 |         |                                                | PRO 131, ALA 132, VAL 134, ALA 136, VAL<br>138, MET 139 |
|                              | PRO 102 |         |                                                |                                                         |

|                                  |         |                  |                  |                           |
|----------------------------------|---------|------------------|------------------|---------------------------|
| <b>Sp_Ubc3.B99990003 → Model</b> | LEU 94  | GLY 136, ALA 137 | PRO 131, ILE 139 | ALA 129                   |
|                                  | ALA 96  |                  | ALA 137          | PRO 131, ILE 139, ALA 140 |
|                                  | PRO 97  |                  | GLY 136, ALA 137 | PRO 131, ILE 139          |
|                                  | GLY 98  |                  | GLY 136, ALA 137 | PRO 131, ILE 139          |
|                                  | PRO 101 |                  |                  |                           |
|                                  | MET 103 |                  |                  |                           |

|                              |         |  |                  |                           |
|------------------------------|---------|--|------------------|---------------------------|
| <b>2KLY_c1 → hsUbe2g2NMR</b> | LEU 93  |  | GLY 135, VAL 138 | PRO 130                   |
|                              | ALA 95  |  | ALA 136          | GLY 135, VAL 138, ALA 140 |
|                              | PRO 96  |  |                  | GLY 135, ALA 136          |
|                              | PRO 100 |  |                  |                           |
|                              | MET 101 |  |                  |                           |
|                              | ALA 107 |  |                  | GLY 135, ALA 136          |

|                              |        |  |                  |                  |
|------------------------------|--------|--|------------------|------------------|
| <b>2KLY_c4 → hsUbe2g2NMR</b> | LEU 93 |  | GLY 135, ALA 136 | VAL 138, ALA 140 |
|------------------------------|--------|--|------------------|------------------|

|         |  |         |                  |
|---------|--|---------|------------------|
| ALA 95  |  | GLY 135 | ALA 136, VAL 138 |
| PRO 96  |  | GLY 135 | ALA 136, VAL 138 |
| PRO 100 |  | VAL 138 | PRO 130          |
| MET 101 |  |         | GLY 135          |
| ALA 107 |  | GLY 135 | ALA 136, VAL 138 |

|                              |         |  |                           |                           |
|------------------------------|---------|--|---------------------------|---------------------------|
| <b>2KLY_c7 → hsUbe2g2NMR</b> | LEU 93  |  |                           |                           |
|                              | ALA 95  |  |                           |                           |
|                              | PRO 96  |  |                           |                           |
|                              | PRO 100 |  | GLY 135, ALA 136          | VAL 138, ALA 140          |
|                              | MET 101 |  | PRO 130, GLY 135, ALA 136 | VAL 138, ALA 140          |
|                              | ALA 107 |  |                           | PRO 130, GLY 135, ALA 136 |
